# Supplementary material for: A systematic review of methods to measure menstrual blood loss
Source: PubMed Central journal article supplement (PMC6106944; doi:10.1186/s12905-018-0627-8), 2018-08-22
Supplement: 12905_2018_627_MOESM1_ESM.pdf [file 12905_2018_627_MOESM1_ESM.pdf]

# A systematic review of methods to measure menstrual blood loss

## SUPPLEMENTAL TABLE 1

Full electronic search strategy of Embase<sup>®</sup>™ and Medline<sup>®</sup>, including limits, performed in Ovid<sup>®</sup> on 2 March, 2016.

| Search string | Search term                                                                                                                                                                                                  | Number of hits |
|---------------|--------------------------------------------------------------------------------------------------------------------------------------------------------------------------------------------------------------|----------------|
| 1             | MENORRHAGIA/                                                                                                                                                                                                 | 12,374         |
| 2             | HYPERMENORRHEA/                                                                                                                                                                                              | 7,039          |
| 3             | (menorrhag\$ or hypermenorrh\$).tw.                                                                                                                                                                          | 8,137          |
| 4             | menometrorrhag\$.tw.                                                                                                                                                                                         | 752            |
| 5             | metromenorrhag\$.tw.                                                                                                                                                                                         | 25             |
| 6             | (menstru\$ adj3 (bleed\$ or blood loss)).tw.                                                                                                                                                                 | 6,338          |
| 7             | (heavy adj1 (period\$ or menses or menstrual or menstruation)).tw.                                                                                                                                           | 2,157          |
| 8             | (dysfunction\$ adj3 (uterine or uterus) adj3 (bleed\$ or blood\$)).tw.                                                                                                                                       | 1,984          |
| 9             | or/1-8                                                                                                                                                                                                       | 21,121         |
| 10            | SELF REPORT/                                                                                                                                                                                                 | 113,004        |
| 11            | self assess\$.tw.                                                                                                                                                                                            | 28,162         |
| 12            | pbac.tw                                                                                                                                                                                                      | 785            |
| 13            | pictorial blood loss.tw.                                                                                                                                                                                     | 226            |
| 14            | pictorial chart\$.tw.                                                                                                                                                                                        | 69             |
| 15            | pictogram\$.tw.                                                                                                                                                                                              | 670            |
| 16            | electronic medical record/ or electronics/ or recording/                                                                                                                                                     | 166,260        |
| 17            | radiochromium.tw.                                                                                                                                                                                            | 335            |
| 18            | BLOOD VOLUME/                                                                                                                                                                                                | 52,948         |
| 19            | (paper adj3 scale\$).tw.                                                                                                                                                                                     | 1,348          |
| 20            | visual analog\$.tw.                                                                                                                                                                                          | 105,153        |
| 21            | ((subjective\$ or objective\$) adj1 (assess\$ or test\$)).ti.                                                                                                                                                | 4,009          |
| 22            | (menstru\$ blood adj1 (loss or volume) adj3 (estimat\$ or measur\$ or determin\$ or assess\$)).tw.                                                                                                           | 400            |
| 23            | menstrual cup/                                                                                                                                                                                               | 25             |
| 24            | menstrual cup.tw.                                                                                                                                                                                            | 50             |
| 25            | incontinence pad\$.tw.                                                                                                                                                                                       | 432            |
| 26            | alkaline h?ematin.tw.                                                                                                                                                                                        | 224            |
| 27            | (indirect methods or ((menstrual or fluid) adj1 weight) or fluid volume or ((menstrual or iron) adj1 loss) or Fe or iron or ferrous or h?emoglobin or radioactive\$ or radiolabel\$ or counts or tracer).tw. | 1,252,218      |
| 28            | (colo?rimetr\$ or atomic absorption or absorptiometry).tw.                                                                                                                                                   | 133,969        |
| 29            | or/10–28                                                                                                                                                                                                     | 1,827,834      |
| 30            | and/9,29                                                                                                                                                                                                     | 2,751          |
| 31            | conference abstract.af.                                                                                                                                                                                      | 2,368,161      |
| 32            | 30 not 31                                                                                                                                                                                                    | 2,299          |
| 33            | Remove duplicates                                                                                                                                                                                            | 1,458          |

Lines 1–8 were included to locate research related to the health condition. Lines 10–28 were included to locate research related to methods for measuring MBL. The articles retrieved were then screened for studies with an English language abstract on the development or validation of a measure for assessing MBL in women with self-perceived HMB, actual HMB (MBL > 80 mL per cycle), or uterine fibroids, or in women undergoing treatment for HMB. Validation/development studies that used simulated menstrual fluid and those that included women with normal MBL as controls were also eligible for inclusion.

\$ = wildcard search term; ? = optional wildcard search term; adj = specifies that the search terms appear within a specified number of words of each other; af = specifies that the search will include all fields; ti = restricts the search to title; tw = limits the search to text words.
