# Supplementary material for: A systematic review of methods to measure menstrual blood loss
Source: PubMed Central journal article supplement (PMC6106944; doi:10.1186/s12905-018-0627-8), 2018-08-22
Supplement: 12905_2018_627_MOESM2_ESM.pdf [file 12905_2018_627_MOESM2_ESM.pdf]

# A systematic review of methods to measure menstrual blood loss

## SUPPLEMENTAL TABLE 2

Advanced search of the ClinicalTrials.gov website performed on 2 March, 2016, and updated on 25 January, 2017.

| <b>Category</b>  | <b>Terms used</b>               |
|------------------|---------------------------------|
| Search terms     | uterine fibroids OR menorrhagia |
| Conditions       | uterine fibroids OR menorrhagia |
| Outcome measures | Bleeding                        |
