# Supplementary material for: A systematic review of methods to measure menstrual blood loss
Source: Springer Nature journal article supplement (doi:10.1186/s12905-018-0627-8), 2018-08-22
Supplement: MOESM4 [file 16064560]

## A systematic review of methods to measure menstrual blood loss

### SUPPLEMENTAL TABLE 4

#### Further validation of methods.

| Author and year (reference) | Method                                                     | Study population          | N (n) <sup>a</sup>                                             | Recovery of blood/iron                                                                                                                                                                                                                                                                                                                                                                                                                         | Internal consistency                                                                                                                                                                        | Other validation                                                                                                                          |
|-----------------------------|------------------------------------------------------------|---------------------------|----------------------------------------------------------------|------------------------------------------------------------------------------------------------------------------------------------------------------------------------------------------------------------------------------------------------------------------------------------------------------------------------------------------------------------------------------------------------------------------------------------------------|---------------------------------------------------------------------------------------------------------------------------------------------------------------------------------------------|-------------------------------------------------------------------------------------------------------------------------------------------|
| <b>AH</b>                   |                                                            |                           |                                                                |                                                                                                                                                                                                                                                                                                                                                                                                                                                |                                                                                                                                                                                             |                                                                                                                                           |
| Magnay et al., 2011 [1]     | Modified AH method (rapid AH technique for SAP-c products) | Simulated menstrual fluid | N/A (63 towels with simulated fluid samples; 21 for each type) | Linearity was confirmed, and $\geq 85\%$ blood recovery was reproducibly achieved from 0.05–30 mL at 5–100% simulated menstrual fluid compositions (except at low volume/high dilution equivalent to <4 mL)<br><br>Mean extraction efficiency (with absorbency conversion factors): normal, 91.3%; long, 94.3%; night, 94.5%<br><br>There was no significant difference in hemoglobin recovery between towel types (one-way ANOVA, $P > .05$ ) | Intra-assay coefficient of variation was <4.5% for both 5 and 20 mL volumes of blood applied to normal towels (n = 20)                                                                      | Linear regression analysis of reference versus test method gave a coefficient of determination ( $r^2$ ) of 0.991 ( $P < .0001$ , n = 63) |
| Magnay et al. 2010 [2]      | Modified AH (SAP version)                                  | Simulated menstrual fluid | N/A (6/10 simulated fluid samples for each experiment)         | 90% recovery was reproducibly achieved for up to 30 mL of applied volume (n = 10/11 per volume) and at all tested simulated menstrual fluid compositions (n = 6 per composition), except at low volume or high dilution equivalent to <2 mL                                                                                                                                                                                                    | Precision improved as the applied volume increased from 5 mL to 20/30 mL (10 replicates)<br><br>Coefficients of variation (10 replicates): normal, 10.6–6.3; long, 13.4–5.6; night, 9.4–6.0 | –                                                                                                                                         |
| Hurskainen et al., 1998 [3] | Modified AH method                                         | N/A                       | N/A (blood)                                                    | Mean blood recovery of 10–20 mL from tampons and 10–                                                                                                                                                                                                                                                                                                                                                                                           | –                                                                                                                                                                                           | –                                                                                                                                         |

| Author and year (reference)   | Method                                                                                | Study population                                                              | N (n) <sup>a</sup>                             | Recovery of blood/iron                                                                                                                                                                                                                                                                                                                                                      | Internal consistency                                                                                                                                                                                                                                                    | Other validation |
|-------------------------------|---------------------------------------------------------------------------------------|-------------------------------------------------------------------------------|------------------------------------------------|-----------------------------------------------------------------------------------------------------------------------------------------------------------------------------------------------------------------------------------------------------------------------------------------------------------------------------------------------------------------------------|-------------------------------------------------------------------------------------------------------------------------------------------------------------------------------------------------------------------------------------------------------------------------|------------------|
|                               | (Stomacher <sup>®</sup> blender and absorbance at A <sub>564</sub> ; menstrual diary) |                                                                               |                                                | 200 mL from towels (n = 3 per volume): 93%                                                                                                                                                                                                                                                                                                                                  |                                                                                                                                                                                                                                                                         |                  |
| Gannon et al., 1996 [4]       | Modified AH method (detergent extraction; photometric analysis; calibration factor)   | Women with heavy MBL                                                          | 146 (292) (time-expired whole blood)           | There was a linear relationship between 10 and 250 mL of blood (gradient, 1.0; n = 3 per volume)                                                                                                                                                                                                                                                                            | There was good intra-individual correlation between two repeat measurements ( $r = 0.713$ , $P < .001$ )                                                                                                                                                                | –                |
| Vasilenko et al., 1988 [5]    | Modified AH method (volumetric test; non-caustic chemicals; standard curves)          | Women with normal MBL and those diagnosed with dysfunctional uterine bleeding | 10 (35) (whole blood solution; hematocrit 50%) | There was a significant linear relationship between 0 and 10 mL of blood ( $P < .0001$ ) for the four products; on average, extraction efficiency was 96.9%<br><br>Thin maxi pads had a significantly lower slope than blood alone ( $P < .001$ ); extraction efficiency: 7.5 mL, 85.2%; 10.0 mL, 74.8%<br><br>Extraction efficiencies of both brands of tampons were 99.0% | The variation in individuals from menstrual period to period (1.5 SD units) was as great as the variation between women (1.5 SD units); thus, it is advisable to determine blood losses from more than one cycle per woman                                              | –                |
| van Eijkeren et al., 1986 [6] | Modified AH method (Stomacher blender and modified equation for calculation of MBL)   | Women with self-perceived heavy MBL                                           | 21 (21) (outdated whole blood)                 | Mean recovery of blood from tampons and towels (using equation that subtracts blanks and incorporates post-filtration volume; n = 3–4 per volume):<br>10 mL, 98%<br>40 mL, 102%<br>80 mL, 98%<br>140 mL, 99%<br>200 mL, 98%                                                                                                                                                 | The coefficient of variation using this technique varied between 6.1% and 7.5%<br><br>The intra-assay variability (variation on one day) was 3.3%; the inter-assay variability (variation over several days) was 3.8%<br><br>Variation between observers was negligible | –                |

| Author and year (reference)      | Method                                             | Study population                                        | N (n) <sup>a</sup>               | Recovery of blood/iron                                                                                                                                                                                                                                                                                         | Internal consistency                                    | Other validation                                                                     |
|----------------------------------|----------------------------------------------------|---------------------------------------------------------|----------------------------------|----------------------------------------------------------------------------------------------------------------------------------------------------------------------------------------------------------------------------------------------------------------------------------------------------------------|---------------------------------------------------------|--------------------------------------------------------------------------------------|
| Desai et al., 1982 [7]           | Modified AH method (Stomacher blender; automation) | N/A                                                     | N/A (blood)                      | Both types of pads, “gave close to 100% recovery”, using 500 mL of sodium hydroxide and 15 min of extraction per pad                                                                                                                                                                                           | Intra-individual and intracycle variation was low       | External validation (Indian population)                                              |
| Newton et al., 1977 [8]          | Modified AH method (Stomacher blender; automation) | N/A                                                     | N/A (peripheral blood)           | Mean recovery of blood (5–200 mL; n = 4 per volume) from seven tampons and pads was 82–93% (coefficient of variation on replicate analysis was 3.4–11.0%)<br><br>Mean recovery of 20 mL of blood added to each of 13 products (n = 4): 20.3 mL (range, 18.4–22.3 mL)                                           | –                                                       | –                                                                                    |
| Shaw et al., 1972 [9]            | Modified AH method (increased incubation time)     | N/A                                                     | N/A (outdated whole blood)       | Recovery of blood (n = 3):<br>Pads:<br>0.1 mL, 95–103%<br>0.5 mL, 98–101%<br>Pads and tampons:<br>1.0 mL, 95–100%<br>2.0 mL, 98–100%<br>3.0 mL, 100–104%<br>4.0 mL, 96–105%<br>5.0 mL, 96–100%<br><br>Average recovery of vaginal MBL from tampons after insertion for 6–16 h: 102.5% (range, 100–107%; n = 6) | –                                                       | –                                                                                    |
| Hallberg & Nilsson, 1964 [10]    | AH                                                 | Healthy women tested the accuracy of the method         | 2 (24) (simulated fluid samples) | Recovery of dried blood (n = 10 per test):<br>After 5 h, 87.4% (SE, 1.0)<br>After 20 h, 96.3% (SE, 0.5)                                                                                                                                                                                                        | Consistent losses were seen over 12 cycles in two women | –                                                                                    |
| <b>MFL</b>                       |                                                    |                                                         |                                  |                                                                                                                                                                                                                                                                                                                |                                                         |                                                                                      |
| Gudmundsdottir et al., 2009 [11] | MFL                                                | Women with diagnosed heavy MBL or normally menstruating | 78 (78)                          | –                                                                                                                                                                                                                                                                                                              | –                                                       | External validation (adults vs teenagers; users of oral contraceptives vs non-users) |

| Author and year (reference)               | Method                                                                          | Study population                                                       | N (n) <sup>a</sup> | Recovery of blood/iron                                                                                   | Internal consistency                                                                                                                                                                                                                                                                                          | Other validation                                            |
|-------------------------------------------|---------------------------------------------------------------------------------|------------------------------------------------------------------------|--------------------|----------------------------------------------------------------------------------------------------------|---------------------------------------------------------------------------------------------------------------------------------------------------------------------------------------------------------------------------------------------------------------------------------------------------------------|-------------------------------------------------------------|
|                                           |                                                                                 | women/adolescents                                                      |                    |                                                                                                          |                                                                                                                                                                                                                                                                                                               |                                                             |
| Fraser et al., 2001 [12]                  | Regression estimation of MBL from total MFL                                     | Women with self-perceived normal MBL, heavy MBL, or previous heavy MBL | 24 (48)            | –                                                                                                        | Median inter-cycle variability: MBL, 18%<br>MFL, 26%                                                                                                                                                                                                                                                          | –                                                           |
| <b>Measurement of iron/labelled blood</b> |                                                                                 |                                                                        |                    |                                                                                                          |                                                                                                                                                                                                                                                                                                               |                                                             |
| Cheyne & Shepherd, 1970 [13]              | Chemical [14] and atomic absorption spectrophotometry analysis of iron recovery | Menstruating women                                                     | N/A (25 used pads) | Recovery of added iron (n = 3–4):<br>atomic absorption, 97.5–105%<br>chemical determination, 98.1–100.9% | SD of difference in duplicate estimations among six washes:<br>either method,<br>0.1 mg Fe/100 mL<br>Average SD from mean, ±3%<br><br>SD of differences in samples (mg Fe/100 mL):<br>atomic absorption, 0.029<br>chemical, 0.067<br>Average SD from mean (%):<br>atomic absorption, ±0.90<br>chemical, ±2.24 | –                                                           |
| Tauxe, 1962 [15]                          | Radioactivity counting dome                                                     | N/A                                                                    | N/A                | –                                                                                                        | Experimental accuracy of counting dome from series of six different quantities of venous blood, 2 SDs = 1.72 (1.6% of mean 104.89 mL)<br><br>0.8% error of radioactivity over 10 different sites on the dome                                                                                                  | –                                                           |
| Baldwin et al., 1961 [16]                 | Fe <sup>59</sup> radioactive iron                                               | N/A                                                                    | N/A (pooled blood) | –                                                                                                        | The error in recovery of blood samples was consistently less than 0.5 mL per 20 mL                                                                                                                                                                                                                            | –                                                           |
| <b>PBAC</b>                               |                                                                                 |                                                                        |                    |                                                                                                          |                                                                                                                                                                                                                                                                                                               |                                                             |
| MacEachern et al., 2015 [17]              | e-PBAC<br>e-BQ                                                                  | Women without menstrual disorder                                       | 47 (47)            | –                                                                                                        | –                                                                                                                                                                                                                                                                                                             | External validation (oral contraceptive users vs non-users) |
| Goshtasebi et al., 2015 [18]              | PBAC<br>SF-36                                                                   | Women with self-perceived HMB                                          | 76 (304)           | –                                                                                                        | –                                                                                                                                                                                                                                                                                                             | External validation (Iranian women)                         |
| Hald & Lieng, 2014 [19]                   | Modified PBAC (revised icons)                                                   | Untreated women with self-perceived light, normal, or                  | 118 (236)          | –                                                                                                        | Intra-class correlation coefficient for PBAC                                                                                                                                                                                                                                                                  | –                                                           |

| Author and year (reference)  | Method                                                  | Study population                                                         | N (n) <sup>a</sup> | Recovery of blood/iron  | Internal consistency                                                                   | Other validation                                                                                                                                                                  |
|------------------------------|---------------------------------------------------------|--------------------------------------------------------------------------|--------------------|-------------------------|----------------------------------------------------------------------------------------|-----------------------------------------------------------------------------------------------------------------------------------------------------------------------------------|
|                              |                                                         | heavy MBL reporting on two cycles                                        |                    |                         | measurements in two cycles, 0.86<br>Inter-individual variation in PBAC scores was high |                                                                                                                                                                                   |
| Revel-Vilk et al., 2012 [20] | PBAC and HSC bleeding questionnaire                     | Adolescent girls                                                         | 66 (66)            | –                       | –                                                                                      | External validation (adolescents)                                                                                                                                                 |
| Sanchez et al., 2012 [21]    | PBAC                                                    | Menstruating adolescents                                                 | 73 (73)            | –                       | –                                                                                      | External validation (adolescents)                                                                                                                                                 |
| Nahidi et al., 2011 [22]     | Modified PBAC (revised icons, volume loss)              | Women with or without menstrual disorder                                 | 160 (320)          | –                       | –                                                                                      | External validation (Iranian women)                                                                                                                                               |
| Biri et al., 2007 [23]       | PBAC [24]                                               | Menstruating women                                                       | 600 (600)          | –                       | –                                                                                      | External validation (PBAC in Turkish women)                                                                                                                                       |
| Shapley & Redman, 1995 [25]  | PBAC                                                    | Women aged $\geq 40$ years                                               | 283 (283)          | –                       | –                                                                                      | PBAC may overestimate MBL in the general community                                                                                                                                |
| Janssen et al., 1995 [26]    | Modified PBAC                                           | Women with self-perceived normal or heavy MBL or with unexplained anemia | 288 (489)          | –                       | 85% of participants were consistent in assessment of their second menses               | Agreement between participant and investigator scores was good                                                                                                                    |
| Higham et al., 1990 [27]     | PBAC                                                    | Women with a range of MBLs                                               | 28 (55)            | –                       | –                                                                                      | Agreement between gynecologist and participant scores was good (within 2 SDs)                                                                                                     |
| <b>Menstrual pictogram</b>   |                                                         |                                                                          |                    |                         |                                                                                        |                                                                                                                                                                                   |
| Magnay et al., 2014 [28]     | Menstrual pictogram (SAP version)                       | Women with self-perceived light, normal, or heavy MBL                    | 119 (235)          | –                       | –                                                                                      | Participant and expert ratings concurred for 59% (1,957/3,315) of towels ( $\kappa = 0.46$ ); in 95% of cases the scoring discrepancy was less than or equal to one icon category |
| Larsen et al., 2013 [29]     | Modified menstrual pictogram (excluding extraneous MBL) | Women with confirmed HMB                                                 | 170 (169)          | –                       | –                                                                                      | External validation (North American treated population)                                                                                                                           |
| Magnay et al., 2013          | Menstrual                                               | Premenopausal women with                                                 | 12                 | There was a significant | There was a high level of                                                              | There was no significant                                                                                                                                                          |

| Author and year (reference)                     | Method                                   | Study population                                                                                 | N (n) <sup>a</sup>                | Recovery of blood/iron                                                                                                                                                                                        | Internal consistency                                                                                                                                                                                                                                       | Other validation                                                                                                                                                 |
|-------------------------------------------------|------------------------------------------|--------------------------------------------------------------------------------------------------|-----------------------------------|---------------------------------------------------------------------------------------------------------------------------------------------------------------------------------------------------------------|------------------------------------------------------------------------------------------------------------------------------------------------------------------------------------------------------------------------------------------------------------|------------------------------------------------------------------------------------------------------------------------------------------------------------------|
| [30]                                            | pictogram (SAP version)                  | regular menstrual cycles who had not previously used a graphical method to assess menstrual loss | (N/A) (simulated menstrual fluid) | correlation between the volume of blood applied and that recovered by AH ( $r^2 = 0.992$ , $P < .0001$ ), and between the volume of fluid applied and the soiled towel weight ( $r^2 = 0.998$ , $P < .0001$ ) | agreement between individual scores: for 112 (83%) of 135 towels, the participants' readings either completely concurred or differed by only a single icon; there was no significant difference between the 12 sets of scores (ANOVA on ranks, $P > .05$ ) | difference between expert and participant ratings (ANOVA on ranks, $P > .05$ ; $n = 135$ towels)                                                                 |
| Wyatt et al., 2002 [31]                         | Menstrual pictogram Symptometrics device | Women with self-perceived normal or heavy MBL                                                    | 59 (109)                          | –                                                                                                                                                                                                             | –                                                                                                                                                                                                                                                          | Overall agreement between paper assessment charts for MBL: cycle 1, 92%; cycle 2, 92%; $\kappa$ : cycle 1, 0.84 ( $P < .00001$ ); cycle 2, 0.81 ( $P < .00001$ ) |
| <b>Methods involving self-perception of MBL</b> |                                          |                                                                                                  |                                   |                                                                                                                                                                                                               |                                                                                                                                                                                                                                                            |                                                                                                                                                                  |
| Matteson et al., 2015 [32]                      | MBQ                                      | Non-pregnant women with and without self-reported HMB                                            | 27 (–)<br><br>13 (–)              | –<br><br>–                                                                                                                                                                                                    | MBQ domains were internally consistent (Cronbach's alpha = 0.87–0.94)<br><br>There was good-to-excellent correlation of daily, weekly, and monthly recall scores ( $\rho = 0.80$ – $0.92$ )                                                                | –<br><br>–                                                                                                                                                       |
| Toxqui et al., 2014 [33]                        | MBL score                                | Healthy women                                                                                    | 165 (–)                           | –                                                                                                                                                                                                             | Cronbach's alpha coefficient for MBL score was 0.83                                                                                                                                                                                                        | –                                                                                                                                                                |
| Rae et al., 2013 [34]                           | Health Utilities Index questionnaire     | Women with von Willebrand disease                                                                | 185 (185)                         | –                                                                                                                                                                                                             | –                                                                                                                                                                                                                                                          | External validation (von Willebrand disease)                                                                                                                     |
| Bushnell et al., 2010 [35]                      | MIQ                                      | Women with self-perceived normal MBL or diagnosed heavy MBL                                      | 262 (262)                         | –                                                                                                                                                                                                             | With one exception, all intra-class correlation coefficients (reflecting test–retest reliability) for treatments and controls were $>0.70$ ( $n = 131$ )                                                                                                   | Correlations across MIQ and to other questionnaires were almost all highly significant ( $P < .001$ )                                                            |
| de Souza et al. 2010 [36]                       | SF-36                                    | Women with heavy MBL defined as $>80$ mL for $\geq 3$ months                                     | 58 (58)                           | –                                                                                                                                                                                                             | –                                                                                                                                                                                                                                                          | External validation (Portuguese women)                                                                                                                           |
| Lee et al., 2006 [37]                           | Question-naire (MBL, number of pads)     | Adolescent girls                                                                                 | 2411 (–)                          | –                                                                                                                                                                                                             | –                                                                                                                                                                                                                                                          | External validation (Malaysian adolescents)                                                                                                                      |

| Author and year (reference) | Method                                                                    | Study population                                                        | N (n) <sup>a</sup> | Recovery of blood/iron | Internal consistency                                                                                                                         | Other validation                                                                                                              |
|-----------------------------|---------------------------------------------------------------------------|-------------------------------------------------------------------------|--------------------|------------------------|----------------------------------------------------------------------------------------------------------------------------------------------|-------------------------------------------------------------------------------------------------------------------------------|
| Pawar et al., 2008 [38]     | QoL questionnaire                                                         | Adolescent women                                                        | 45 (-)             | -                      | -                                                                                                                                            | External validation (US adolescents)                                                                                          |
| Warner et al., 2004 [39]    | MEQ                                                                       | Women with self-perceived menstrual complaint                           | 209 (N/A)          | -                      | Compared with the previous 6 months the collected period was reported as: more in amount, 5%; the same, 16%; a bit less, 42%; much less, 36% | -                                                                                                                             |
| Johannes et al., 2000 [40]  | A prototype electronic menstrual calendar and an identical paper calendar | Women with self-perceived normal MBL                                    | 24 (N/A)           | -                      | -                                                                                                                                            | Overall, participants preferred the electronic version (69.6% vs 21.7%; <i>P</i> =.006)                                       |
| Haynes et al. 1977 [41]     | Subjective complaint                                                      | Women with self-perceived heavy MBL (25) and women with normal MBL (12) | 37 (>269)          | -                      | -                                                                                                                                            | Compared to women with normal MBL there was no difference in the coefficient of variation for MBL from one period to the next |

<sup>a</sup>N = study population size; n = number of cycles studied.

AH = alkaline hematin; ANOVA = analysis of variance; BQ = bleeding questionnaire; HMB = heavy menstrual bleeding; HSC = Hospital for Sick Children; MBL = menstrual blood loss; MBQ = Menstrual Bleeding Questionnaire; MEQ = Menstrual Evaluation Questionnaire; MFL = menstrual fluid loss; MIQ = Menorrhagia Impact Questionnaire; PBAC = pictorial blood loss assessment chart; SAP = superabsorbent polymer; SD = standard deviation; SE = standard error; SF-36 = Medical Outcomes Study 36-item Short Form Health Survey.

## References

1. Magnay JL, Schonicke G, Nevatte TM, O'Brien S, Junge W. Validation of a rapid alkaline hematin technique to measure menstrual blood loss on feminine towels containing superabsorbent polymers. *Fertil Steril*. 2011;96:394–398.
2. Magnay JL, Nevatte TM, Dhingra V, O'Brien S. Menstrual blood loss measurement: validation of the alkaline hematin technique for feminine hygiene products containing superabsorbent polymers. *Fertil Steril*. 2010;94:2742–2746.
3. Hurskainen R, Teperi J, Turpeinen U, Grenman S, Kivela A, Kujansuu E, et al. Combined laboratory and diary method for objective assessment of menstrual blood loss. *Acta Obstet Gynecol Scand*. 1998;77:201–204.
4. Gannon MJ, Day P, Hammadieh N, Johnson N. A new method for measuring menstrual blood loss and its use in screening women before endometrial ablation. *Br J Obstet Gynaecol*. 1996;103:1029–1033.
5. Vasilenko P, Kraicer PF, Kaplan R, deMasi A, Freed N. A new and simple method of measuring menstrual blood loss. *J Reprod Med Obstet Gynecol*. 1988;33:293–297.
6. van Eijkeren MA, Scholten PC, Christiaens GC, Alsbach GP, Haspels AA. The alkaline hematin method for measuring menstrual blood loss—a modification and its clinical use in menorrhagia. *Eur J Obstet Gynecol Reprod Biol*. 1986;22:345–51.
7. Desai H, Raghavan KS, Mapa MK, Gupta AN. Quantitative estimation of menstrual blood loss. *Ind J Med Res*. 1982;75:827–830.
8. Newton J, Barnard G, Collins W. A rapid method for measuring menstrual blood loss using automatic extraction. *Contraception*. 1977;16:269–282.
9. Shaw ST, Jr., Aaronson DE, Moyer DL. Quantitation of menstrual blood loss—further evaluation of the alkaline hematin method. *Contraception*. 1972;5:497–513.
10. Hallberg L, Nilsson L. Determination of menstrual blood loss. *Scand J Clin Lab Invest*. 1964;16:244–248.
11. Gudmundsdottir BR, Hjaltalin EF, Bragadottir G, Hauksson A, Geirsson RT, Onundarson PT. Quantification of menstrual flow by weighing protective pads in women with normal, decreased or increased menstruation. *Acta Obstet Gynecol Scand*. 2009;88:275–279.
12. Fraser IS, Warner P, Marantos PA. Estimating menstrual blood loss in women with normal and excessive menstrual fluid volume. *Obstet Gynecol*. 2001;98:806–814.
13. Cheyne GA, Shepherd MM. Comparison of chemical and atomic absorption methods for estimating menstrual blood loss. *J Med Lab Technol*. 1970;27:350–354.
14. Ramsay WN. Iron metabolism and haemoglobin formation in the embryonated hen egg. 2. Some observations on the embryonic blood supply. *Biochem J*. 1951;49:494–9.
15. Tauxe WN. Quantitation of menstrual blood loss: a radioactive method utilizing a counting dome. *J Nucl Med*. 1962;3:282–287.
16. Baldwin RM, Whalley PJ, Pritchard JA. Measurements of menstrual blood loss. *Am J Obstet Gynecol*. 1961;81:739–742.
17. MacEachern K, Kaur H, Toukh M, Mumal I, Hamilton A, Scovil S, et al. Comprehensive evaluation of hemostasis in normal women: impact on the diagnosis of mild bleeding disorders. *Clin Appl Thromb Hemost*. 2015;21:72–81.
18. Goshtasebi A, Mazari Z, Behboudi Gandevani S, Naseri M. Anti-hemorrhagic activity of *Punica granatum L.* flower (Persian Golnar) against heavy menstrual bleeding of endometrial origin: a double-blind, randomized controlled trial. *Med J Islam Repub Iran*. 2015;29:199.
19. Hald K, Lieng M. Assessment of periodic blood loss: interindividual and intraindividual variations of pictorial blood loss assessment chart registrations. *J Min Invas Gynecol*. 2014;21:662–668.



20. Revel-Vilk S, Paltiel O, Lipschuetz M, Ilan U, Hyam E, Shai E, et al. Underdiagnosed menorrhagia in adolescents is associated with underdiagnosed anemia. *J Pediatr*. 2012;160:468–472.
21. Sanchez J, Andrabi S, Bercaw JL, Dietrich JE. Quantifying the PBAC in a pediatric and adolescent gynecology population. *Pediatr Hematol Oncol*. 2012;29:479–484.
22. Nahidi F, Bagheri L, Jannesari S, Majd HA. Relationship between delivery type and menstrual disorders: a case–control study. *J Res Health Sci*. 2011;11:83–90.
23. Biri A, Bozkurt N, Korucuoglu U, Yilmaz E, Tiras B, Guner H. Use of pictorial chart for managing menorrhagia among Turkish women. *J Turk Ger Gynecol Assoc*. 2007;9:35–37.
24. Higham JM, Shaw RW. Clinical associations with objective menstrual blood volume. *Eur J Obstet Gynecol Reprod Biol*. 1999;82:73–76.
25. Shapley M, Redman CWE. Assessment of menstrual blood loss using a pictorial chart and endometrial sampling within the community. *J Obstet Gynaecol*. 1995;15:123–124.
26. Janssen CAH, Scholten PC, Heintz APM. A simple visual assessment technique to discriminate between menorrhagia and normal menstrual blood loss. *Obstet Gynecol*. 1995;85:977–982.
27. Higham JM, O'Brien PMS, Shaw RW. Assessment of menstrual blood loss using a pictorial chart. *Br J Obstet Gynaecol*. 1990;97:734–739.
28. Magnay JL, Nevatte TM, O'Brien S, Gerlinger C, Seitz C. Validation of a new menstrual pictogram (superabsorbent polymer-c version) for use with ultraslim towels that contain superabsorbent polymers. *Fertil Steril*. 2014;101:515–522.e5.
29. Larsen L, Coyne K, Chwalisz K. Validation of the menstrual pictogram in women with leiomyomata associated with heavy menstrual bleeding. *Reprod Sci*. 2013;20:680–687.
30. Magnay JL, Nevatte TM, Seitz C, O'Brien S. A new menstrual pictogram for use with feminine products that contain superabsorbent polymers. *Fertil Steril*. 2013;100:1715–21.e1–4.
31. Wyatt KM, Dimmock PW, Hayes-Gill B, Crowe J, O'Brien PMS. Menstrual symptometrics: A simple computer-aided method to quantify menstrual cycle disorders. *Fertil Steril*. 2002;78:96–101.
32. Matteson KA, Scott DM, Raker CA, Clark MA. The menstrual bleeding questionnaire: development and validation of a comprehensive patient-reported outcome instrument for heavy menstrual bleeding. *Br J Obstet Gynaecol*. 2015;122:681–9.
33. Toxqui L, Perez-Granados AM, Blanco-Rojo R, Wright I, Vaquero MP. A simple and feasible questionnaire to estimate menstrual blood loss: relationship with hematological and gynecological parameters in young women. *BMC Women's Health*. 2014;14 (1):71.
34. Rae C, Furlong W, Horsman J, Pullenayegum E, Demers C, St-Louis J, et al. Bleeding disorders, menorrhagia and iron deficiency: impacts on health-related quality of life. *Haemophilia*. 2013;19:385–91.
35. Bushnell DM, Martin ML, Moore KA, Richter HE, Rubin A, Patrick DL. Menorrhagia Impact Questionnaire: assessing the influence of heavy menstrual bleeding on quality of life. *Curr Med Res Opin*. 2010;26:2745–2755.
36. de Souza SS, Camargos AF, Ferreira MC, de Assis Nunes Pereira F, de Rezende CP, Araujo CA, et al. Hemoglobin levels predict quality of life in women with heavy menstrual bleeding. *Arch Gynecol Obstet*. 2010;281:895–900.
37. Lee LK, Chen PCY, Lee KK, Kaur J. Menstruation among adolescent girls in Malaysia: a cross-sectional school survey. *Singapore Med J*. 2006;47:869–874.
38. Pawar A, Krishnan R, Davis K, Bosma K, Kulkarni R. Perceptions about quality of life in a school-based population of adolescents with menorrhagia: implications for adolescents with bleeding disorders. *Haemophilia*. 2008;14:579–83.
39. Warner PE, Critchley HOD, Lumsden MA, Campbell-Brown M, Douglas A, Murray GD. Menorrhagia I: measured blood loss, clinical features, and outcome in women with heavy periods – a survey with follow-up data. *Am J Obstet Gynecol*. 2004;190:1216–1223.

40. Johannes CB, Crawford SL, Woods J, Goldstein RB, Tran D, Mehrotra S, et al. An electronic menstrual cycle calendar: comparison of data quality with a paper version. *Menopause*. 2000;7:200–8.
41. Haynes PJ, Hodgson H, Anderson AB, Turnbull AC. Measurement of menstrual blood loss in patients complaining of menorrhagia. *Br J Obstet Gynaecol*. 1977;84:763–8.
