# Supplementary material for: A systematic review of methods to measure menstrual blood loss
Source: BMC Womens Health. 2018 Aug 22;18:142. doi: 10.1186/s12905-018-0627-8 (PMC6106944; doi:10.1186/s12905-018-0627-8)
Supplement: Supplementary file 5 — Table S5. Correlations of methods with established standards. (PDF 168 kb) [file 12905_2018_627_MOESM5_ESM.pdf]

# A systematic review of methods to measure menstrual blood loss

## SUPPLEMENTAL TABLE 5

### Correlations of methods with established standards.

| Author and year (reference)                         | Method                       | Study population                                                                      | N (n) <sup>a</sup> | Correlated variable (reference)                              | <i>r</i>               | <i>P</i> value | $\kappa$ |
|-----------------------------------------------------|------------------------------|---------------------------------------------------------------------------------------|--------------------|--------------------------------------------------------------|------------------------|----------------|----------|
| <b>AH</b>                                           |                              |                                                                                       |                    |                                                              |                        |                |          |
| Hallberg & Nilsson, 1964 [1]                        | AH                           | Healthy women                                                                         | 1 (1)              | Iron isotope activity method over three portions of a period | Good agreement         | –              | –        |
| <b>Measurement of iron/labelled red blood cells</b> |                              |                                                                                       |                    |                                                              |                        |                |          |
| Napolitano et al., 2014 [2]                         | Menstrual iron loss          | Women with normal or confirmed heavy MBL                                              | 105 (105)          | MFL                                                          | 0.789                  | <.001          | –        |
| <b>MFL, duration of menses, number of pads</b>      |                              |                                                                                       |                    |                                                              |                        |                |          |
| Magnay et al., 2014 [3]                             | Duration of menses           | Women with self-perceived light, normal, or heavy MBL                                 | 119 (235)          | AH [4]                                                       | No correlation         | –              | –        |
|                                                     | No. of sanitary items        |                                                                                       |                    | AH [4]                                                       | No correlation<br>0.97 | –              | –        |
|                                                     | MFL                          |                                                                                       |                    | AH [4]                                                       |                        | <.0001         |          |
| Schumacher et al., 2012 [5]                         | MBL estimated from MFL       | Women with confirmed heavy MBL                                                        | 162 (648)          | AH [1,6]                                                     | 0.73                   | <.0001         | –        |
| Gudmundsdottir et al., 2009 [7]                     | MFL                          | Women and adolescents with self-perceived normal or heavy MBL, or diagnosed heavy MBL | 113 (113)          | Subjective MBL                                               | Correlation            | –              | –        |
| Reid & Virtanen-Kari, 2005 [8]                      | Total MFL                    | Women with confirmed heavy MBL (MBL ≥80 mL)                                           | 42 (126)           | Change in MBL [6]                                            | 0.88                   | <.0001         | –        |
| Warner et al., 2004 [9]                             | Total number of pads/tampons | Women with self-perceived menstrual complaint                                         | 226 (225)          | AH [1]                                                       | 0.30                   | <.001          | –        |
| Wyatt et al., 2001 [10]                             | Number of sanitary items     | Women with self-perceived normal or heavy MBL                                         | 108 (108)          | AH [1]                                                       | No overall correlation | –              | –        |
| Fraser et al.,                                      | Total log MFL                | Women with self-perceived                                                             | 53 (106)           | AH (log MBL) [1,6]                                           | 0.93                   | <.001          | –        |

| Author and year (reference)    | Method                                                                      | Study population                                      | N (n) <sup>a</sup>                           | Correlated variable (reference)    | <i>r</i>                       | <i>P</i> value   | <i>κ</i>              |
|--------------------------------|-----------------------------------------------------------------------------|-------------------------------------------------------|----------------------------------------------|------------------------------------|--------------------------------|------------------|-----------------------|
| 2001 [11]                      |                                                                             | normal or heavy MBL                                   |                                              |                                    |                                |                  |                       |
| Higham & Shaw, 1999 [12]       | Duration of menses<br>Number of sanitary items                              | Women with self-perceived normal or heavy MBL         | 254 (420)<br>(412)                           | AH [1]                             | 0.35<br>0.61                   | <.01<br><.005    | –                     |
| Vasilenko et al., 1988 [13]    | Pad and tampon counts                                                       | Women with normal MBL or abnormal MBL                 | 10 (35)                                      | Modified AH method [13]            | No correlation                 | –                | –                     |
| Fraser et al., 1984 [14]       | Pad and tampon counts                                                       | Women with self-perceived heavy MBL                   | 60 (240)                                     | AH [1,6]                           | No relationship                | Non-significant  | –                     |
| Baldwin et al., 1961 [15]      | Duration of period                                                          | Women with self-perceived normal or heavy MBL         | 26 (67)                                      | MBL determined by Fe <sup>59</sup> | No relationship                | –                | –                     |
| <b>PBAC</b>                    |                                                                             |                                                       |                                              |                                    |                                |                  |                       |
| Zakherah et al., 2011 [16]     | PBAC (SAP version)                                                          | Women with self-perceived normal or heavy MBL         | 197 (241)                                    | AH [1,17]                          | 0.60                           | <.001            | –                     |
| Reid & Virtanen-Kari, 2005 [8] | PBAC                                                                        | Women with confirmed heavy MBL (MBL ≥80 mL)           | 42 (126)                                     | Change in MBL<br>Total MFL         | 0.53<br>0.58                   | .0007<br>.0002   | –<br>–                |
| Reid et al., 2000 [18]         | PBAC                                                                        | Women with self-perceived heavy MBL                   | 103 (103)                                    | AH [1]                             | 0.4659                         | –                | –                     |
| Deeny et al., 1994 [19]        | PBAC                                                                        | Women with dysfunctional uterine bleeding             | 53 (53)                                      | AH [1]                             | –                              | .001             | –                     |
| Higham et al., 1990 [20]       | PBAC                                                                        | Women with a range of MBL                             | 28 (self-assessed, 55; expert-assessed, 122) | AH [1]                             | 0.847 (self)<br>0.872 (expert) | –<br>–           | –<br>–                |
| <b>Menstrual pictogram</b>     |                                                                             |                                                       |                                              |                                    |                                |                  |                       |
| Magnay et al., 2014 [3]        | Menstrual pictogram (SAP version)                                           | Women with self-perceived light, normal, or heavy MBL | 119 (235)                                    | MFL<br>AH [4]                      | 0.85<br>0.81                   | <.0001<br><.0001 | –<br>–                |
| Larsen et al., 2013 [21]       | Modified menstrual pictogram (revised icons and excluding extraneous blood) | Women with confirmed heavy menstrual bleeding         | 87 (87)                                      | Change in AH from baseline [1,6]   | 0.86 (estimate)                | –                | 0.88 (classification) |

| Author and year (reference)                     | Method                                   | Study population                                            | N (n) <sup>a</sup> | Correlated variable (reference)        | <i>r</i>             | <i>P</i> value | <i>κ</i> |
|-------------------------------------------------|------------------------------------------|-------------------------------------------------------------|--------------------|----------------------------------------|----------------------|----------------|----------|
| Wyatt et al., 2002 [22]                         | Menstrual pictogram Symptometrics device | Women with self-perceived normal or heavy MBL               | 20 (20)            | AH [1]                                 | –                    | <.00001        | 0.80     |
| Wyatt et al., 2001 [10]                         | Menstrual pictogram                      | Women with self-perceived normal or heavy MBL               | 108 (108)          | AH [1]                                 | Good agreement       | –              | 0.8      |
| <b>Methods involving self-perception of MBL</b> |                                          |                                                             |                    |                                        |                      |                |          |
| Matteson et al., 2015 [23]                      | MBQ                                      | Women with self-perceived normal and heavy MBL              | 67 (–)             | SF-36                                  | –0.15 to –0.45       | .2 to .0001    | –        |
| Toxqui et al., 2014 [24]                        | MBL score                                | Women with self-perceived normal MBL                        | 165 (–)            | Log ferritin<br>Platelet count         | Negative association | .006<br>.011   | –<br>–   |
| Bushnell et al., 2010 [25]                      | MIQ                                      | Women with self-perceived normal MBL or diagnosed heavy MBL | 262 (655)          | AH                                     | 0.3–0.4              | <.001          | –        |
| de Souza et al., 2010 [26]                      | SF-36                                    | Women with heavy MBL (>80 mL for ≥3 months)                 | 58 (58)            | Physical composite vs PBAC             | 0.166                | .222           | –        |
|                                                 |                                          |                                                             |                    | Mental composite vs PBAC               | 0.063                | .642           | –        |
|                                                 |                                          |                                                             |                    | Physical composite vs hemoglobin level | 0.307                | .020           | –        |
|                                                 |                                          |                                                             |                    | Mental composite vs hemoglobin level   | 0.293                | .027           | –        |
| Pawar et al., 2008 [27]                         | Quality of life questionnaire            | Adolescent women                                            | 45 (–)             | PBAC                                   | –                    | <.025          | –        |
| Mansfield et al., 2004 [28]                     | MVJ scale                                | Women menstruating                                          | 31 (89)            | Log discharge rate                     | 0.683                | –              | –        |
|                                                 |                                          |                                                             |                    | Individual MFL (n = 26)                | 0.480–0.894          | –              | –        |
| Heath et al., 1999 [29]                         | Menstrual record                         | Young adult women                                           | 29 (29)            | MFL (weighed menstrual loss)           | 0.47                 | .012           | –        |
|                                                 | Menstrual recall questionnaires          |                                                             |                    |                                        | 0.61                 | .001           | –        |

<sup>a</sup>N = study population size; n = number of cycles studied.

AH = alkaline hematin; MBL = menstrual blood loss; MBQ = menstrual bleeding questionnaire; MFL = menstrual fluid loss; MIQ = Menorrhagia Impact Questionnaire; MVJ = Mansfield–Voda–Jorgensen Menstrual Bleeding Scale; PBAC = pictorial blood loss assessment chart; SAP = superabsorbent polymer; SF-36 = Medical Outcomes Study 36-item Short Form Health Survey.

## References

1. Hallberg L, Nilsson L. Determination of menstrual blood loss. *Scand J Clin Lab Invest*. 1964;16:244–248.
2. Napolitano M, Dolce A, Celenza G, Grandone E, Perilli MG, Siragusa S, et al. Iron-dependent erythropoiesis in women with excessive menstrual blood losses and women with normal menses. *Ann Hematol*. 2014;93:557–63.
3. Magnay JL, Nevatte TM, O'Brien S, Gerlinger C, Seitz C. Validation of a new menstrual pictogram (superabsorbent polymer-c version) for use with ultraslim towels that contain superabsorbent polymers. *Fertil Steril*. 2014;101:515–522.e5.
4. Magnay JL, Schonicke G, Nevatte TM, O'Brien S, Junge W. Validation of a rapid alkaline hematin technique to measure menstrual blood loss on feminine towels containing superabsorbent polymers. *Fertil Steril*. 2011;96:394–398.
5. Schumacher U, Schumacher J, Mellinger U, Gerlinger C, Wienke A, Endrikat J. Estimation of menstrual blood loss volume based on menstrual diary and laboratory data. *BMC Women's Health*. 2012;12 24.
6. Newton J, Barnard G, Collins W. A rapid method for measuring menstrual blood loss using automatic extraction. *Contraception*. 1977;16:269–282.
7. Gudmundsdottir BR, Hjaltalin EF, Bragadottir G, Hauksson A, Geirsson RT, Onundarson PT. Quantification of menstrual flow by weighing protective pads in women with normal, decreased or increased menstruation. *Acta Obstet Gynecol Scand*. 2009;88:275–279.
8. Reid PC, Virtanen-Kari S. Randomised comparative trial of the levonorgestrel intrauterine system and mefenamic acid for the treatment of idiopathic menorrhagia: a multiple analysis using total menstrual fluid loss, menstrual blood loss and pictorial blood loss assessment charts. *Br J Obstet Gynaecol*. 2005;112:1121–5.
9. Warner PE, Critchley HOD, Lumsden MA, Campbell-Brown M, Douglas A, Murray GD. Menorrhagia I: measured blood loss, clinical features, and outcome in women with heavy periods – a survey with follow-up data. *Am J Obstet Gynecol*. 2004;190:1216–1223.
10. Wyatt KM, Dimmock PW, Walker TJ, O'Brien PMS. Determination of total menstrual blood loss. *Fertil Steril*. 2001;76:125–131.
11. Fraser IS, Warner P, Marantos PA. Estimating menstrual blood loss in women with normal and excessive menstrual fluid volume. *Obstet Gynecol*. 2001;98:806–814.
12. Higham JM, Shaw RW. Clinical associations with objective menstrual blood volume. *Eur J Obstet Gynecol Reprod Biol*. 1999;82:73–76.
13. Vasilenko P, Kraicer PF, Kaplan R, deMasi A, Freed N. A new and simple method of measuring menstrual blood loss. *J Reprod Med Obstet Gynecol*. 1988;33:293–297.
14. Fraser IS, McCarron G, Markham R. A preliminary study of factors influencing perception of menstrual blood loss volume. *Am J Obstet Gynecol*. 1984;149:788–93.
15. Baldwin RM, Whalley PJ, Pritchard JA. Measurements of menstrual blood loss. *Am J Obstet Gynecol*. 1961;81:739–742.
16. Zakherah MS, Sayed GH, El-Nashar SA, Shaaban MM. Pictorial blood loss assessment chart in the evaluation of heavy menstrual bleeding: diagnostic accuracy compared to alkaline hematin. *Gynecol Obstet Invest*. 2011;71:281–284.
17. Shaw ST, Jr., Aaronson DE, Moyer DL. Quantitation of menstrual blood loss—further evaluation of the alkaline hematin method. *Contraception*. 1972;5:497–513.
18. Reid PC, Coker A, Coltart R. Assessment of menstrual blood loss using a pictorial chart: a validation study. *Br J Obstet Gynaecol*. 2000;107:320–322.
19. Deeny M, Davis JA. Assessment of menstrual blood loss in women referred for endometrial ablation. *Eur J Obstet Gynecol Reprod Biol*. 1994;57:179–180.
20. Higham JM, O'Brien PMS, Shaw RW. Assessment of menstrual blood loss using a pictorial chart. *Br J Obstet Gynaecol*. 1990;97:734–739.

21. Larsen L, Coyne K, Chwalisz K. Validation of the menstrual pictogram in women with leiomyomata associated with heavy menstrual bleeding. *Reprod Sci.* 2013;20:680–687.
22. Wyatt KM, Dimmock PW, Hayes-Gill B, Crowe J, O'Brien PMS. Menstrual symptometrics: A simple computer-aided method to quantify menstrual cycle disorders. *Fertil Steril.* 2002;78:96–101.
23. Matteson KA, Scott DM, Raker CA, Clark MA. The menstrual bleeding questionnaire: development and validation of a comprehensive patient-reported outcome instrument for heavy menstrual bleeding. *Br J Obstet Gynaecol.* 2015;122:681–9.
24. Toxqui L, Perez-Granados AM, Blanco-Rojo R, Wright I, Vaquero MP. A simple and feasible questionnaire to estimate menstrual blood loss: relationship with hematological and gynecological parameters in young women. *BMC Women's Health.* 2014;14 (1):71.
25. Bushnell DM, Martin ML, Moore KA, Richter HE, Rubin A, Patrick DL. Menorrhagia Impact Questionnaire: assessing the influence of heavy menstrual bleeding on quality of life. *Curr Med Res Opin.* 2010;26:2745–2755.
26. de Souza SS, Camargos AF, Ferreira MC, de Assis Nunes Pereira F, de Rezende CP, Araujo CA, et al. Hemoglobin levels predict quality of life in women with heavy menstrual bleeding. *Arch Gynecol Obstet.* 2010;281:895–900.
27. Pawar A, Krishnan R, Davis K, Bosma K, Kulkarni R. Perceptions about quality of life in a school-based population of adolescents with menorrhagia: implications for adolescents with bleeding disorders. *Haemophilia.* 2008;14:579–83.
28. Mansfield PK, Voda A, Allison G. Validating a pencil-and-paper measure of perimenopausal menstrual blood loss. *Women's Health Issues.* 2004;14:242–247.
29. Heath ALM, Skeaff CM, Gibson RS. Validation of a questionnaire method for estimating extent of menstrual blood loss in young adult women. *J Trace Elem Med Biol.* 1999;12:231–235.
